# Supplementary material
Source: MDPI journal article supplement (https://www.mdpi.com/2075-163X/12/5/592)
Supplement: s1 [file s1]

## Article

# Continuous Bioleaching of Arsenic-Containing Copper-Zinc Concentrate and Shift of Microbial Population under Various Conditions

Yuliya Elkina, Aleksandra Nechaeva, Alena Artykova, Aleksandr Kolosoff, Aliya Bugubaeva, Vitaliy Melamud, Andrey Mardanov and Aleksandr Bulaev \*

**Table S1.** Mineral content in the concentrate (based on XRD data).

| Content, %                            |                                                                   |                     |                            |                               |                                                  |
|---------------------------------------|-------------------------------------------------------------------|---------------------|----------------------------|-------------------------------|--------------------------------------------------|
| Chalcopyrite<br>(CuFeS <sub>2</sub> ) | Tennantite<br>(Cu <sub>12</sub> As <sub>4</sub> S <sub>13</sub> ) | Sphalerite<br>(ZnS) | Pyrite (FeS <sub>2</sub> ) | Quartz<br>(SiO <sub>2</sub> ) | Gypsum<br>(CaSO <sub>4</sub> ·2H <sub>2</sub> O) |
| 10                                    | 14                                                                | 15                  | 50                         | 7                             | 3                                                |

**Table S2.** As, Cu, and Zn extraction (%) during biooxidation.

| T, °C | Carbon Source      | Extraction, % |          |           |
|-------|--------------------|---------------|----------|-----------|
|       |                    | As            | Cu       | Zn        |
| 40    | CO <sub>2</sub>    | 24.5±1.5      | 19.5±0.9 | 77.4±3.6  |
|       | Molasses           | 24.1±0.6      | 20.2±0.4 | 79.8±1.6  |
|       | Aeration (control) | 24.7±0.0      | 18.7±0.7 | 79.5±3.3  |
| 45    | CO <sub>2</sub>    | 26.9±1.0      | 24.5±1.8 | 78.6±1.6  |
|       | Molasses           | 25.6±1.4      | 26.1±1.3 | 78.9±1.9  |
|       | Aeration (control) | 25.1±1.5      | 23.0±1.2 | 82.1±1.8  |
| 50    | CO <sub>2</sub>    | 28.4±0.3      | 25.5±1.5 | 71.1±5.0  |
|       | Molasses           | 25.7±1.7      | 27.0±1.1 | 67.7±3.6  |
|       | Aeration (control) | 27.1±0.6      | 23.9±5.6 | 68.1±16.8 |
| 55    | CO <sub>2</sub>    | 20.0±2.1      | 22.2±1.0 | 70.4±3.8  |
|       | Molasses           | 13.9±1.7      | 20.2±1.1 | 67.0±5.0  |
|       | Aeration (control) | 5.4±7.6       | 21.8±0.6 | 70.6±1.5  |
| 60    | CO <sub>2</sub>    | 0.7±0.2       | 20.1±2.8 | 62.3±5.3  |
|       | Molasses           | 0.6±0.1       | 9.9±0.3  | 41.2±1.7  |
|       | Aeration (control) | 0.7±0.1       | 10.3±1.1 | 45.3±3.8  |

**Table S3.** Chemical composition of bioleaching residues.

| Temperature,<br>°C | Carbon<br>Source      | Content, % |       |       |      |                    |                      |                |                      |
|--------------------|-----------------------|------------|-------|-------|------|--------------------|----------------------|----------------|----------------------|
|                    |                       | As         | Fe    | Cu    | Zn   | S <sub>total</sub> | S <sub>sulfate</sub> | S <sup>0</sup> | S <sub>sulfide</sub> |
| 40                 | CO <sub>2</sub>       | 2.65       | 24.80 | 10.80 | 3.07 | 30.6               | 1.2                  | 1.4            | 28.0                 |
|                    | Molasses              | 2.85       | 24.70 | 10.80 | 2.90 | 30.1               | 1.2                  | 1.3            | 27.6                 |
|                    | Aeration<br>(control) | 2.70       | 25.00 | 10.00 | 2.66 | 30.6               | 1.2                  | 1.2            | 28.2                 |
| 45                 | CO <sub>2</sub>       | 3.10       | 21.20 | 11.95 | 4.00 | 28.8               | 1.4                  | 0.8            | 26.6                 |
|                    | Molasses              | 2.30       | 25.85 | 9.10  | 3.05 | 32.5               | 1.2                  | 0.8            | 30.5                 |
|                    | Aeration<br>(control) | 2.55       | 26.75 | 10.25 | 2.80 | 32.9               | 1.3                  | 0.6            | 31.0                 |
| 50                 | CO <sub>2</sub>       | 2.60       | 26.75 | 11.40 | 3.50 | 30.9               | 1.8                  | 1.3            | 27.8                 |
|                    | Molasses              | 2.25       | 27.75 | 9.72  | 4.50 | 33.2               | 2.0                  | 1.2            | 30.0                 |
|                    | Aeration<br>(control) | 2.45       | 24.75 | 9.95  | 2.97 | 30.8               | 2.1                  | 1.2            | 27.5                 |
| 55                 | CO <sub>2</sub>       | 2.25       | 30.00 | 7.75  | 2.37 | 34.2               | 2.4                  | 1.5            | 30.3                 |
|                    | Molasses              | 1.60       | 36.80 | 5.42  | 3.05 | 37.7               | 1.9                  | 1.5            | 34.3                 |
|                    | Aeration<br>(control) | 1.95       | 34.40 | 6.65  | 2.05 | 36.6               | 2.2                  | 1.3            | 33.1                 |
| 60                 | CO <sub>2</sub>       | 2.10       | 30.10 | 5.50  | 3.15 | 38.2               | 2.1                  | 1.7            | 34.4                 |
|                    | Molasses              | 1.80       | 29.50 | 5.60  | 5.20 | 38.6               | 1.2                  | 1.6            | 35.8                 |
|                    | Aeration<br>(control) | 2.10       | 30.00 | 6.10  | 4.10 | 39.1               | 0.5                  | 1.3            | 37.3                 |
